# Supplementary material for: Saltatory Conduction along Myelinated Axons Involves a Periaxonal Nanocircuit
Source: PubMed Central journal article supplement (PMC6978798; doi:10.1016/j.cell.2019.11.039), 2020-01-23
Supplement: mmc1.pdf [file mmc1.pdf]

**Cell, Volume 180**

**Supplemental Information**

**Saltatory Conduction along Myelinated**

**Axons Involves a Periaxonal Nanocircuit**

**Charles C.H. Cohen, Marko A. Popovic, Jan Klooster, Marie-Theres Weil, Wiebke Möbius, Klaus-Armin Nave, and Maarten H.P. Kole**

**Table S1, related to Figure 1 | Boundaries of the cable parameter solution space**

| Parameter                                            | Lower Bound      | Upper Bound       |
|------------------------------------------------------|------------------|-------------------|
| $R_i$ ( $\Omega$ cm)                                 | 50 <sup>a</sup>  | 400 <sup>b</sup>  |
| $R_m$ ( $k\Omega$ cm <sup>2</sup> )                  | 0.1 <sup>c</sup> | 200 <sup>b</sup>  |
| $C_m$ ( $\mu$ F cm <sup>-2</sup> )                   | 0.5 <sup>d</sup> | 2 <sup>e</sup>    |
| $R_{my}$ ( $k\Omega$ cm <sup>2</sup> )               | 20 <sup>f</sup>  | 1600 <sup>f</sup> |
| $C_{my}$ ( $\mu$ F cm <sup>-2</sup> )                | 0.005            | 0.2               |
| $r_{pa}$ ( $G\Omega$ cm <sup>-1</sup> ) <sup>g</sup> | 5                | $2.5 \times 10^7$ |
| $r_{pn}$ ( $T\Omega$ cm <sup>-1</sup> ) <sup>g</sup> | 0.05             | $2.5 \times 10^6$ |

<sup>a</sup>(Fenstermacher et al., 1970). <sup>b</sup>(Major et al., 1994). <sup>c</sup>(Rapp et al., 1994; Tasaki, 1955). <sup>d</sup>(Major et al., 1994). <sup>e</sup>(Rapp et al., 1994). <sup>f</sup>(Bakiri et al., 2011; Chan et al., 2013). <sup>g</sup>The  $r_{pa}$  and  $r_{pn}$  parameter apply to double cable models only.

**Table S2, related to Figure 1 | Optimal cable parameters for single cable models**

| Cell (#)       | $R_i$ ( $\Omega$ cm) | $R_m$ ( $k\Omega$ cm <sup>2</sup> ) | $C_m$ ( $\mu$ F cm <sup>-2</sup> ) | $R_{my}$ ( $k\Omega$ cm <sup>2</sup> ) | $C_{my}$ ( $\mu$ F cm <sup>-2</sup> ) |
|----------------|----------------------|-------------------------------------|------------------------------------|----------------------------------------|---------------------------------------|
| 1              | 93.1                 | 22.9                                | 0.953                              | 50.5                                   | 0.185                                 |
| 2              | 134                  | 23.9                                | 1.08                               | 1180                                   | 0.154                                 |
| 3              | 376                  | 23.3                                | 1.77                               | 37.6                                   | 0.163                                 |
| 4              | 243                  | 23.3                                | 1.24                               | 73.0                                   | 0.189                                 |
| 5              | 211                  | 23.5                                | 1.19                               | 991                                    | 0.187                                 |
| 6              | 144                  | 22.0                                | 1.45                               | 842                                    | 0.166                                 |
| <b>Average</b> | <b>200</b>           | <b>23.1</b>                         | <b>1.28</b>                        | <b>530</b>                             | <b>0.174</b>                          |
| <b>SEM</b>     | <b>35.2</b>          | <b>0.218</b>                        | <b>0.101</b>                       | <b>184</b>                             | <b>0.00510</b>                        |

Cable parameter solutions for neuronal ( $R_i$ ,  $R_m$  and  $C_m$ ) and myelin sheath parameters ( $R_{my}$  and  $C_{my}$ ).

**Table S3, related to Figure 1 | Optimal cable parameters for somato-somatic, somato-dendritic, and somato-AIS recordings**

| Cell (#)       | $V_{inj}$ location | $V_{rec}$ location | $R_i$ ( $\Omega$ cm) | $R_m$ ( $k\Omega$ cm <sup>2</sup> ) | $C_m$ ( $\mu$ F cm <sup>-2</sup> ) |
|----------------|--------------------|--------------------|----------------------|-------------------------------------|------------------------------------|
| 7              | Soma               | Soma               | 155                  | 19.1                                | 1.31                               |
| 8              | Soma               | Soma               | 111                  | 21.9                                | 1.37                               |
| 9              | Soma               | Soma               | 83.9                 | 21.5                                | 0.902                              |
| 10             | Dend               | Soma               | 139                  | 31.1                                | 1.18                               |
| 11             | Soma               | Dend               | 150                  | 24.5                                | 1.01                               |
| 12             | AIS                | Soma               | 75.3                 | 29.4                                | 0.838                              |
| <b>Average</b> |                    |                    | <b>119</b>           | <b>24.6</b>                         | <b>1.10</b>                        |
| <b>SEM</b>     |                    |                    | <b>14.0</b>          | <b>1.94</b>                         | <b>0.0893</b>                      |

**Table S4, related to Figure 1 | Optimal electrical parameters for double cable models**

| Cell (#)       | $R_i$<br>( $\Omega$ cm) | $R_m$<br>( $k\Omega$ cm <sup>2</sup> ) | $C_m$<br>( $\mu$ F cm <sup>-2</sup> ) | $r_{pa}$<br>( $G\Omega$ cm <sup>-1</sup> ) | $r_{pn}$<br>( $T\Omega$ cm <sup>-1</sup> ) | $R_{my}$<br>( $k\Omega$ cm <sup>2</sup> ) | $C_{my}$<br>( $\mu$ F cm <sup>-2</sup> ) |
|----------------|-------------------------|----------------------------------------|---------------------------------------|--------------------------------------------|--------------------------------------------|-------------------------------------------|------------------------------------------|
| 1              | 230                     | 18.9                                   | 1.23                                  | 84.4                                       | 1.50                                       | 467                                       | 0.0118                                   |
| 2              | 98.3                    | 25.2                                   | 0.986                                 | 135                                        | 4.39                                       | 101                                       | 0.0115                                   |
| 3              | 261                     | 25.2                                   | 1.37                                  | 141                                        | 3.56                                       | 579                                       | 0.00769                                  |
| 4              | 158                     | 25.8                                   | 1.06                                  | 188                                        | 4.07                                       | 152                                       | 0.0161                                   |
| 5              | 109                     | 27.7                                   | 1.01                                  | 105                                        | 0.877                                      | 75.2                                      | 0.0678                                   |
| 6              | 71.2                    | 24.8                                   | 1.23                                  | 96.3                                       | 0.321                                      | 63.7                                      | 0.113                                    |
| <b>Average</b> | <b>155</b>              | <b>24.6</b>                            | <b>1.15</b>                           | <b>125</b>                                 | <b>2.45</b>                                | <b>240</b>                                | <b>0.0379</b>                            |
| <b>SEM</b>     | <b>31.2</b>             | <b>1.22</b>                            | <b>0.0617</b>                         | <b>0.155</b>                               | <b>0.719</b>                               | <b>91.6</b>                               | <b>0.0175</b>                            |

Cable parameter solutions for neuronal ( $R_i$ ,  $R_m$  and  $C_m$ ), submyelin ( $r_{pa}$  and  $r_{pn}$ ) and myelin sheath parameters ( $R_{my}$  and  $C_{my}$ ). The morphologies of cell#1 to #6 are shown in Figure S2.
